# Supplementary material for: The putative oligosaccharide translocase SypK connects biofilm formation with quorum signaling in Vibrio fischeri
Source: PubMed Central journal article supplement (PMC4263508; doi:10.1002/mbo3.199), 2014-09-25
Supplement: mbo30003-0836-sd1.pdf [file mbo30003-0836-sd1.pdf]

1 **Supporting Information**

2  
3 **The putative oligosaccharide translocase SypK connects biofilm formation with quorum**  
4 **signaling in *Vibrio fischeri***

5  
6 Tim Miyashiro<sup>1,2,\*</sup>, Dane Oehlert<sup>2</sup>, Valerie A. Ray<sup>3</sup>, Karen L. Visick<sup>3</sup>, and Edward G. Ruby<sup>2</sup>

7  
8 <sup>1</sup> Department of Biochemistry and Molecular Biology  
9 Eberly College of Science  
10 The Pennsylvania State University  
11 University Park, PA 16802, USA

12  
13 <sup>2</sup> Department of Medical Microbiology and Immunology  
14 University of Wisconsin School of Medicine and Public Health  
15 Madison, WI 53706, USA

16  
17 <sup>3</sup> Department of Microbiology and Immunology  
18 Loyola University Medical Center  
19 Maywood, IL 60153, USA

20  
21 \* Corresponding author  
22 Email: [tim14@psu.edu](mailto:tim14@psu.edu)  
23 Phone: (+1) 814 865 1916  
24 Fax: (+1) 814 863 7024

25  
26 **This file contains:**

27  
28 Strain Construction  
29 Primer List (Table S1)  
30 References  
31

## 32 **Strain Construction**

33 Natural transformation to generate DRO222. Template DNA for natural transformation was  
34 prepared from the plasmid generated for sequencing the transposon insertion site within  
35 DRO5F11. Approximately 1 µg plasmid DNA was digested with EcoRI-HF (New England  
36 Biolabs, Ipswich, MA, USA) in a 25-µl reaction at 37°C. After 1 h, the reaction was stopped by  
37 using a QIAquick PCR Purification Kit (Qiagen, Venlo, Netherlands) according to the  
38 manufacturer's instructions and eluted with 40 µl water.

39 A culture of ES114 harboring pLosTfoX was grown overnight at 28°C with aeration in  
40 DMM containing 9.9 mM glucosamine and 2.5 µg/ml chloramphenicol. The culture was diluted  
41 1:4 into fresh media and grown at 28°C. After 1.5 h, 500 µl culture was combined with DNA  
42 template described above and incubated at room temperature. After 30 min, 1 ml LBS was  
43 added to the mixture and grown at 28°C overnight with aeration. The culture was concentrated  
44 by centrifugation and the resulting pellet was resuspended in 150 µl LBS, which was spread  
45 onto LBS agar containing 5.0 µg/ml erythromycin and incubated at 28°C. An erythromycin-  
46 resistant colony was selected as DRO222 and further characterized as described in the main  
47 text.

48

49 Allelic exchange vectors. To construct the plasmid pTM327, which contains the  $\Delta luxPQ$  allele  
50 that removes the codons corresponding to amino acids 5-372 of LuxP and 1-734 of LuxQ, the  
51 regions surrounding *luxPQ* were amplified from ES114 genomic DNA by PCR using primers  
52 *luxPQ-5-XhoI-U/luxPQ-5-BamHI-L* and *luxPQ-3-BamHI-U/luxPQ-3-XbaI-L*, digested by  
53 *XhoI/BamHI* and *BamHI/XbaI*, and cloned into the vector fragment of pEVS79 that had been  
54 digested with *XhoI/XbaI*.

55 To construct pTM375, which contains the  $\Delta sypK$  allele that removes the codons  
56 corresponding to amino acids 13-465 of SypK, the regions surrounding *sypK* were amplified  
57 from ES114 genomic DNA by PCR using primers *VF\_A1030-5-SalI-U/VF\_A1030-5-EcoRI-L* and

58 VF\_A1030-3-EcoRI-U/VF\_A1030-3-NheI-L, digested by Sall/EcoRI and EcoRI/NheI, and cloned  
59 into the vector fragment of pEVS79 that had been digested with Sall/XbaI.

60 Introduction of the  $\Delta luxPQ$  and  $\Delta sypK$  alleles into ES114 was performed as previously  
61 described for other allele exchange vectors (Miyashiro *et al.*, 2010).

62 Construction of KV4829, KV5972, and KV6010, which contain deletions of *luxU*, *luxQ*,  
63 and *luxP* were generated using pVAR18, pVAR29, and pVAR30, respectively, as previously  
64 described (Ray and Visick, 2012).

65

66 Chromosomal integration vectors. To construct pTM239, which contains *gfp* downstream of the  
67 *qrr1* promoter, the *qrr1* promoter region was amplified from ES114 genomic DNA by PCR using  
68 primers *qrr1-prom-KpnI-U/ qrr1-prom-SpeI-L*, and the product was digested with KpnI/SpeI.

69 The *gfp* gene was isolated by digesting pTM146 with SpeI/EcoRV. The *qrr1* promoter and *gfp*  
70 fragments were ligated to the vector fragment of pEVS107 that had been digested with SpeI,  
71 made blunt with T4 DNA polymerase, and digested with XbaI. Integration of pEVS107-derived  
72 plasmids into the Tn7 site was performed as previously described (McCann *et al.*, 2003).

73

74 IPTG-inducible plasmids. Plasmids pTM367 and pTM368 contain *sypK* (VF\_A1030) and *sypL*  
75 (VF\_A1031), respectively, downstream of the IPTG-inducible  $P_{trc}$  promoter. To construct  
76 pTM367, *sypK* was amplified from ES114 genomic DNA by PCR using primers *sypK-KpnI-*  
77 *U/sypK-Sall-L*, digested with KpnI/Sall, and cloned into the vector fragment of pTM214 that had  
78 been digested with KpnI/Sall. To construct pTM368, *sypL* was amplified from ES114 genomic  
79 DNA by PCR using primers *sypL-KpnI-U/sypL-Sall-L*, digested with KpnI/Sall, and cloned into  
80 the vector fragment of pTM214 that had been digested with KpnI/Sall.

81

82 LuxQ variant plasmids. Plasmid pVAR48 contains the wild-type *luxQ* allele tagged with the  
83 FLAG epitope. To construct pVAR48, *luxQ* was amplified from ES114 genomic DNA by PCR

84 using primers 1314 and 1437, digested by XhoI/KpnI, and cloned into the vector fragment of  
85 pVSV105 that had been digested with Sall/KpnI.

86 Plasmids pVAR50 and pVAR51 contain the A216P and H378A alleles of *luxQ-FLAG*,  
87 respectively. To construct pVAR50 and pVAR51, pVAR48 was mutagenized using the Change-  
88 IT Multiple Mutation Site Directed Mutagenesis Kit (Stratagene, La Jolla, CA, USA) with primer  
89 sets 849/1425 and 849/1426, respectively. Mutations were confirmed by sequencing.

90

91 *sypK* plasmid. Plasmid pVAR70 contains the wild-type *sypK* allele tagged with the FLAG  
92 epitope. To construct pVAR70, *sypK* was amplified from ES114 genomic DNA by PCR using  
93 primers 1167 and 1580, digested by XbaI/KpnI, and cloned into the vector fragment of pVSV105  
94 that had been digested with XbaI/KpnI. The clone was confirmed by sequencing. The *sypK*-  
95 *FLAG* allele was subcloned from the resulting vector using Sall/BglII, and cloned into the vector  
96 fragment of pKV282 that had been cut with Sall/BamHI.

97

98 **Table S1. Primers used in this study.**

| Primer name        | Primer Sequence                                                |
|--------------------|----------------------------------------------------------------|
| luxPQ-5-XhoI-U     | GGCTCGAGGTAGCGATAACTACAGATACTTTA                               |
| luxPQ-5-BamHI-L    | GTGGATCCGTTGCGCATTACAACCAACCAGAA                               |
| luxPQ-3-BamHI-U    | GAGGATCCGAGAACGGGTTGCCACCTTTTGAC                               |
| luxPQ-3-XbaI-L     | GATCTAGAGATGTTGCGATTATGGATTTACCC                               |
| VF_A1030-5-Sall-U  | AGGTTCGACGCAAAAAGCCATTATGGTGTTTATC                             |
| VF_A1030-5-EcoRI-L | GGGAATTCTTTAGCATGGGTGATAAAGGAAAT                               |
| VF_A1030-3-EcoRI-U | CGGAATTCTCTCATCACTTTTCTAAAAAAGA                                |
| VF_A1030-3-NheI-L  | GGGCTAGCGGATTTACTCTTTTAATTGGTTTA                               |
| qrr1-prom-KpnI-U   | GAGGTACCAGCCAACACATCAAAACCTG                                   |
| qrr1-prom-SpeI-L   | AAACTAGTGGTCAATATACCTATTGCAG                                   |
| 849                | CCTGTGTGAAATTGTTATCCG                                          |
| 1167               | CATACTAAGTGCGGCCCTATCATTAGATGAGGTGAAACAATGAG                   |
| 1314               | CTGGTGTAGAACACTAGTAATG                                         |
| 1425               | GATAATAAGATATTACCATCAAGTGTAAGTTCC                              |
| 1426               | TTAGCAAGAATGAGTGCTGAAATAAGAACGCCCT                             |
| 1437               | AAAAAGGTACCTTATTTATCATCATCATCTTTATAATCCGAGTCAAAAAGGTGGCAACCCG  |
| 1580               | GGTACCTTATTTATCATCATCATCTTTATAATCTAGTGTTTTTCTGTTTGTCTTTTTTTAGG |
| sypK-KpnI-U        | CGGGTACCTTAGATGAGGTGAAACAATGAGTC                               |
| sypK-Sall-L        | CGGTTCGACTCATAGTGTTTTTCTGTTTGTTTC                              |
| sypL-KpnI-U        | GGGGTACCGAACAAACAGGAAAAACACTATGA                               |
| sypL-Sall-L        | GGGTTCGACTTACTCTTTTTAATTGGTTTAATGC                             |
| rpoD-qPCR-U        | AGAAACCGCTCCTGATGCTGATGA                                       |
| rpoD-qPCR-L        | TACTGGGTTCAGTTGTACGGCCAAT                                      |
| litR-qPCR-U        | AGGCCTAGAACAAGGCTATCTCCA                                       |
| litR-qPCR-L        | TAGCGACAGAGACCTGAGCGATTT                                       |
| sypA-qPCR-U        | AAGGTGATATGGACGCCATCGGTT                                       |
| sypA-qPCR-L        | AGCGCCAATACCTGATGAATCT                                         |
| sypF-qPCR-U        | AAGGCCCAGGAGCACAAGTTGATA                                       |
| sypF-qPCR-L        | GCAGCTTCTGCTTCATTTCTGGCT                                       |
| sypJ-qPCR-U        | CAGCTCAACTTGATCGTCTTCGCT                                       |
| sypJ-qPCR-L        | TCCCGCAATGAGAGCTTCAAGGAT                                       |
| sypK-qPCR-U        | TGGCTTTCGAAGGAATGATTGCCG                                       |
| sypK-qPCR-L        | ATGGCCTGAAGTAATGCTCGACCT                                       |
| sypL-qPCR-U        | CTTGGCATCAACGCCTCATTTGGTT                                      |
| sypL-qPCR-L        | TCCGCCTCGACTTTTGTGTTGCTAT                                      |
| sypM-qPCR-U        | TGCTTTACGGTGGCTTACCCTTCT                                       |
| sypM-qPCR-L        | ATTTCGTTCCGCCACTAAAGGTCGT                                      |
| sypP-qPCR-U        | TTGTTGTTGGTAATGCTGGGCGAC                                       |
| sypP-qPCR-L        | AGCCAGAACCTGCAAGCAGTAAGT                                       |

99

100

101 **References**

102 McCann, J., Stabb, E. V., Millikan, D. S. and Ruby, E. G. (2003) Population dynamics of *Vibrio*  
103 *fischeri* during infection of *Euprymna scolopes*. *Appl Environ Microbiol* **69**: 5928-34.

104  
105 Miyashiro, T., Wollenberg, M. S., Cao, X., Oehlert, D. and Ruby, E. G. (2010) A single *qrr* gene  
106 is necessary and sufficient for LuxO-mediated regulation in *Vibrio fischeri*. *Mol Microbiol* **77**:  
107 1556-67.

108  
109 Ray, V. A. and Visick, K. L. (2012) LuxU connects quorum sensing to biofilm formation in *Vibrio*  
110 *fischeri*. *Mol Microbiol* **86**: 954-70.

111

112
